# Supplementary material for: Highly Sensitive EGFRvIII Detection in Circulating Extracellular Vesicle RNA of Glioma Patients
Source: PubMed Central journal article supplement — Clin Cancer Res. 2022 Jul 18;28(18):4070–82. doi: 10.1158/1078-0432.CCR-22-0444 (PMC9475243; doi:10.1158/1078-0432.ccr-22-0444), 2022-07-18
Supplement: ccr-22-0444_supplementary_data_ds1_suppds1.pdf [file ccr-22-0444_supplementary_data_ds1_suppds1.pdf]

Supplementary Figure 1

EGFRVIII target amplicon

a.

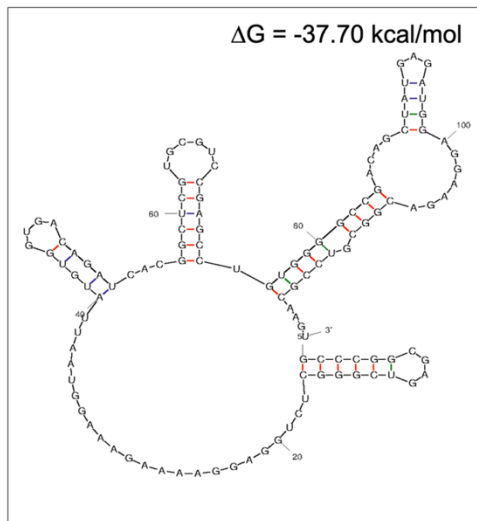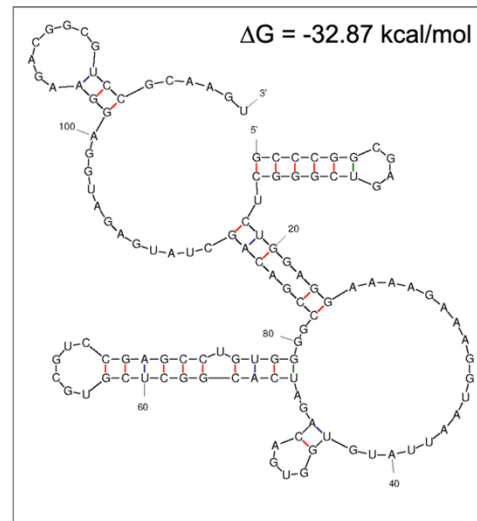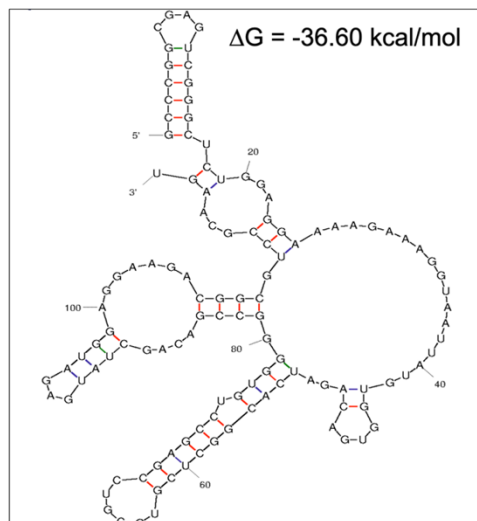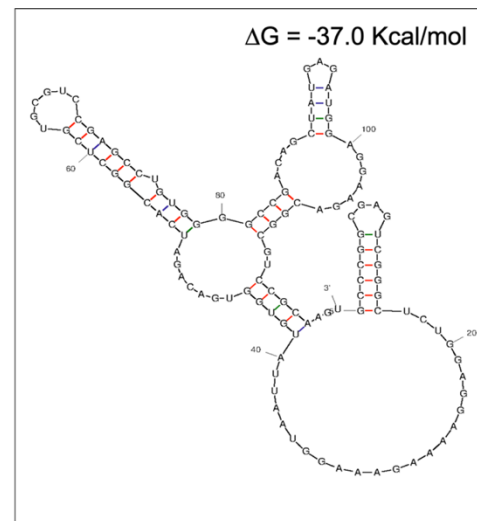

Supplementary Figure 1 (continued)

EGFRvIII target amplicon

b.

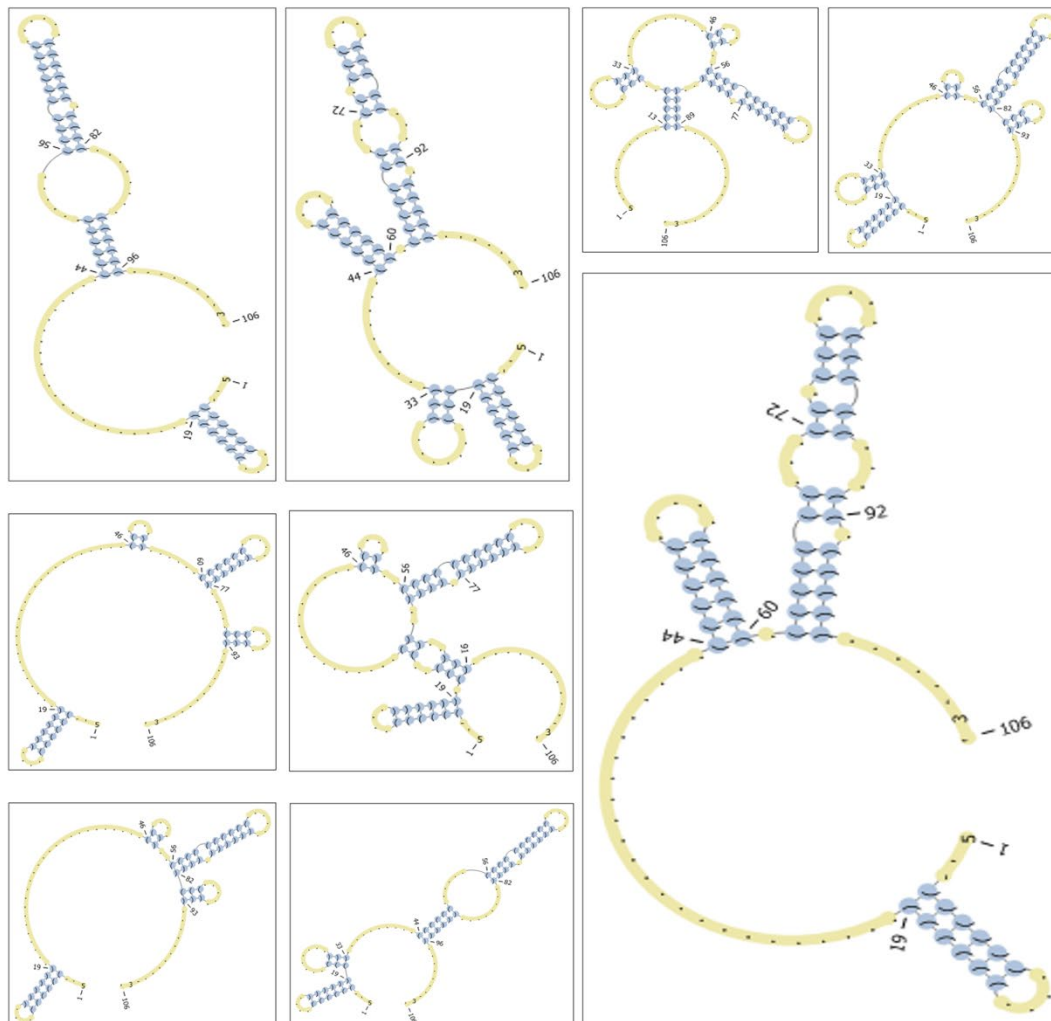

Supplementary Figure 1 (continued)

EGFRwt target amplicon

c.

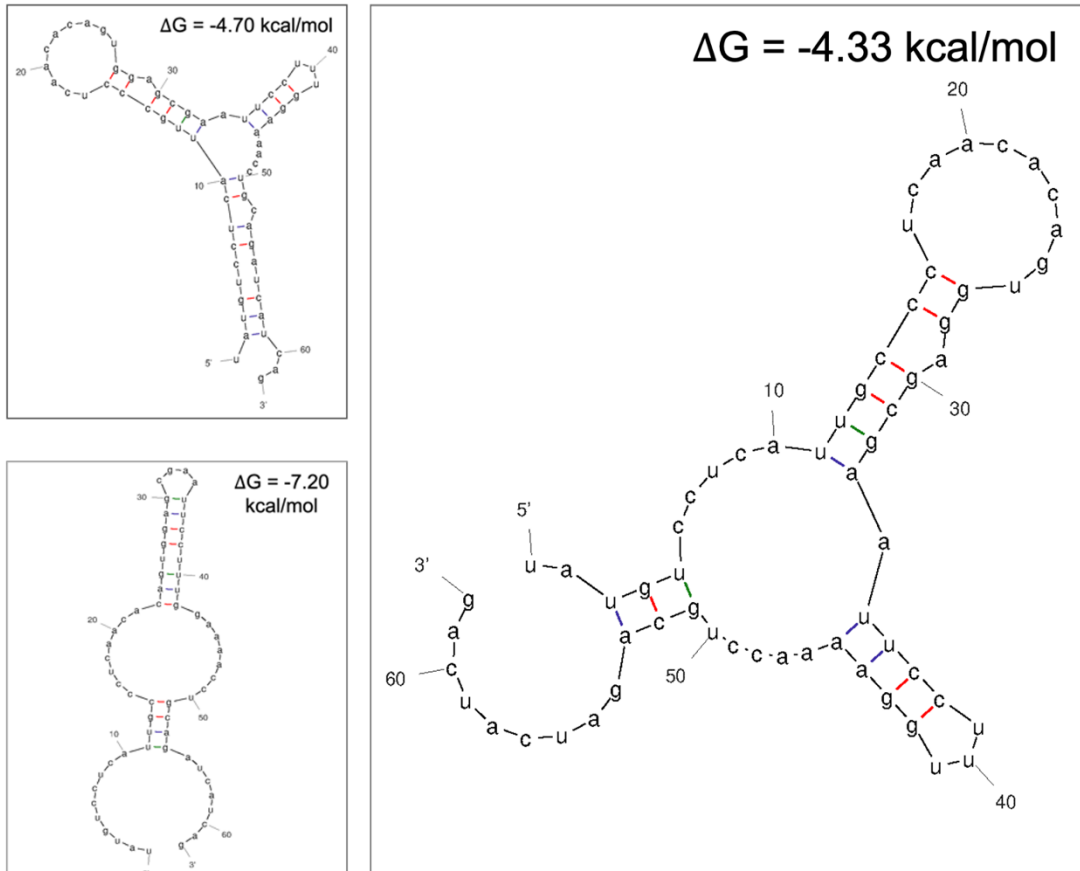

**Supplementary Figure 1: Secondary Structure prediction in target amplicon of EGFRvIII and EGFR wt using Mfold algorithm. (a)** Four distinct secondary structures in target amplicon (96 bp) of EGFRvIII with minimum free energy ( $\Delta G$ ) in the range of (-32.87 to -37.70) kcal/mol. **(b)** Depiction of nine potential pseudoknots in target amplicon of EGFRvIII as predicted by algorithm. **(c)** Three possible secondary structures predicted in EGFR wt target amplicon (62 bp) with  $\Delta G$  in the range of (-4.33 to -7.20) kcal/mol.

Supplementary Figure 2

a. AGACGTCCGGGCAGCCCCGGCGCAGCGCGCCGAGCAGCCTCCGCCCCCGCACGGTGTGAGCGC  
 CCGACGCGGCCGAGGCGGCCGAGTCCCGAGCTAGCCCGGCGGCCGCGCCGCCAGACCGGACGA  
 CAGGCCACCTCGTCGGCGTCCGCCGAGTCCCGCCTCGCCGCAACGCCACAACCACCGCGCACGGC  
 CCCTGACTCCGTCCAGTATTGATCGGGAGAGCCGGAGCGAGCTCTTCGGGGAGCAGCGATGCGACCTC  
 CGGGACGGCCGGGCAGCGTCCCTGGCGTGCTGGCTGCGCTCTGCCCGCGAGTCCGGCTCTGGAG  
 GAAAAGAAAG//GTAATTATGTGGTGACAGATCACGGCTCGTGGTCCGAGGCTGTGGGCGCG  
 ACAGTATGAGATGGAGGAAGACGGCTCCGAAGTGTAAAGATGGGAAGGCTTSCCGCAAAG

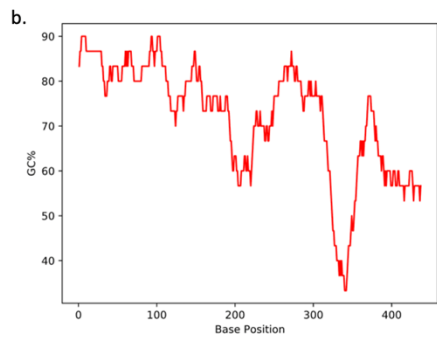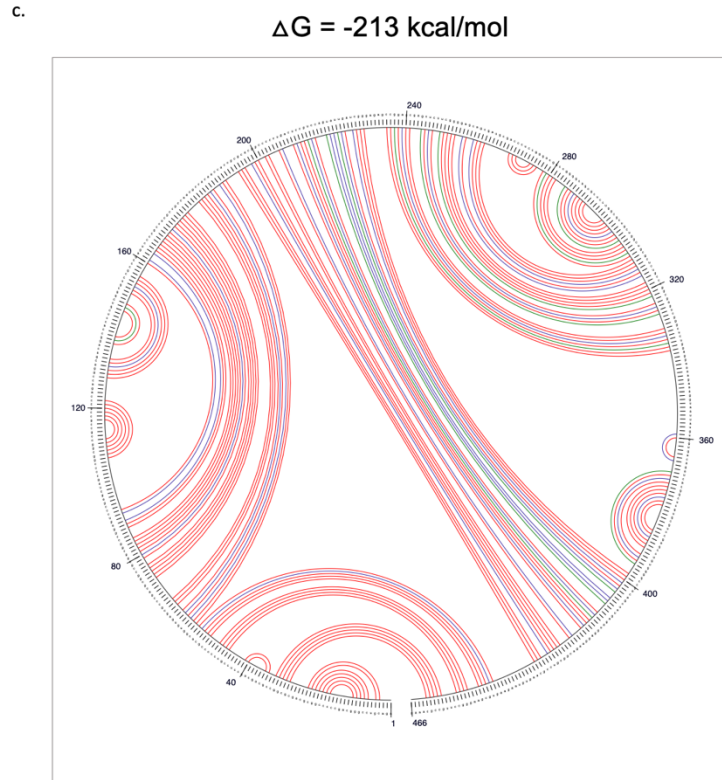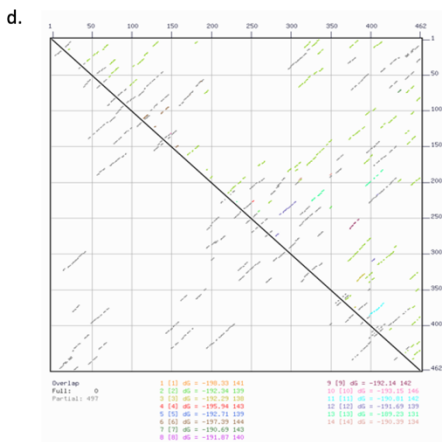

**Supplementary Figure 2: Analysis of nucleotide sequence (467 bp) unique to EGFRvIII at exon1:exon8 junction site (a)** Nucleotide sequence of exons 1:8 fusion where EGFRvIII occurs, highlighting GC, CG and G repeats. **(b)** Graphical representation of the GC content (percentage) in the nucleotide sequence of exon1:exon8 with the calculation based on window size of 30 bases. **(c)** Circle graph obtained from secondary structure prediction analysis illustrating the individual base pair interactions in 20 predicted foldings. Each color represents a distinct base pair interaction. The  $\Delta G$  indicating the thermal stability of the predicted foldings is -213 kcal/mol. **(d)** Energy dot plot of the computed foldings, with different dots representing the superposition and relative thermal stability of all possible foldings.

Supplementary Figure 3

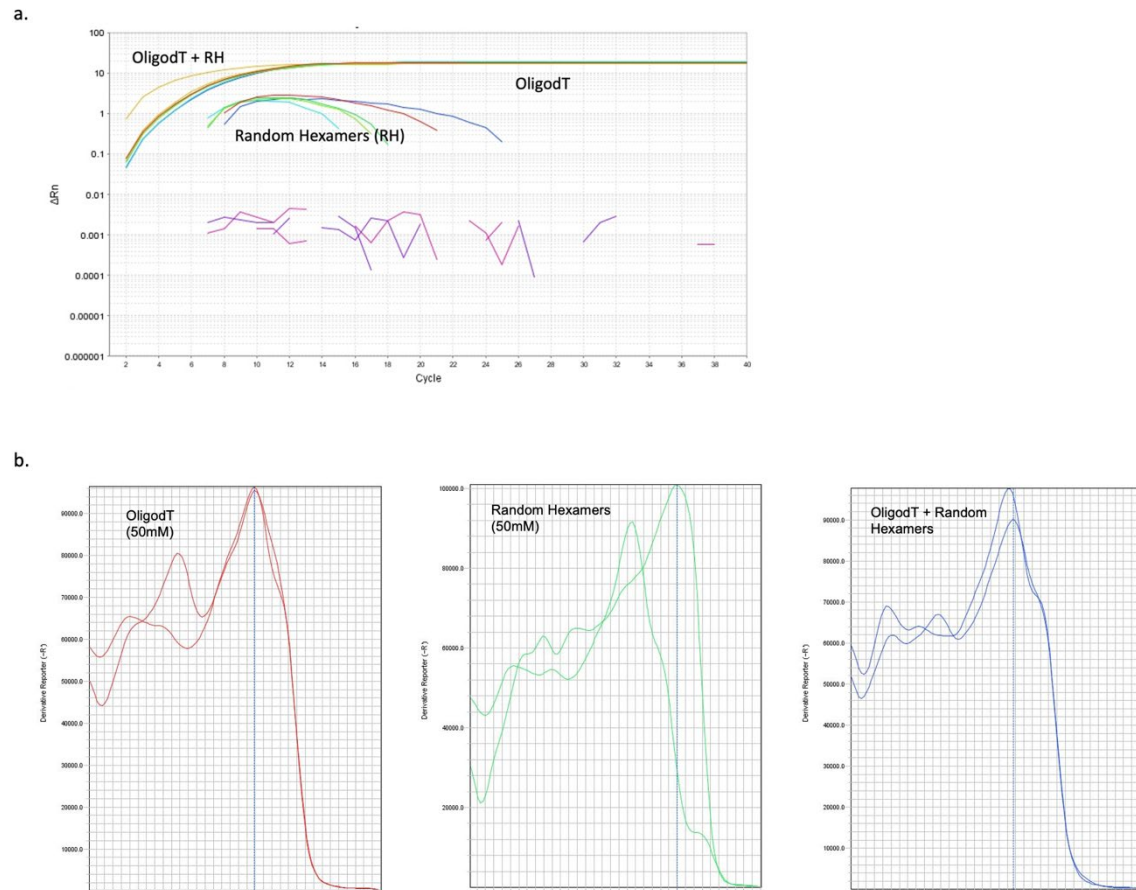

**Supplementary Figure 3: Summary of optimization measures. (a)** Amplification plot demonstrating the effect of using oligodT and Random hexamers in different combinations during reverse transcription on resulting Ct value in qPCR. **(b)** Melt curve plots illustrating the maximum peak and T<sub>m</sub> value of the qPCR product in the three different reverse transcription conditions.

Supplementary Figure 4

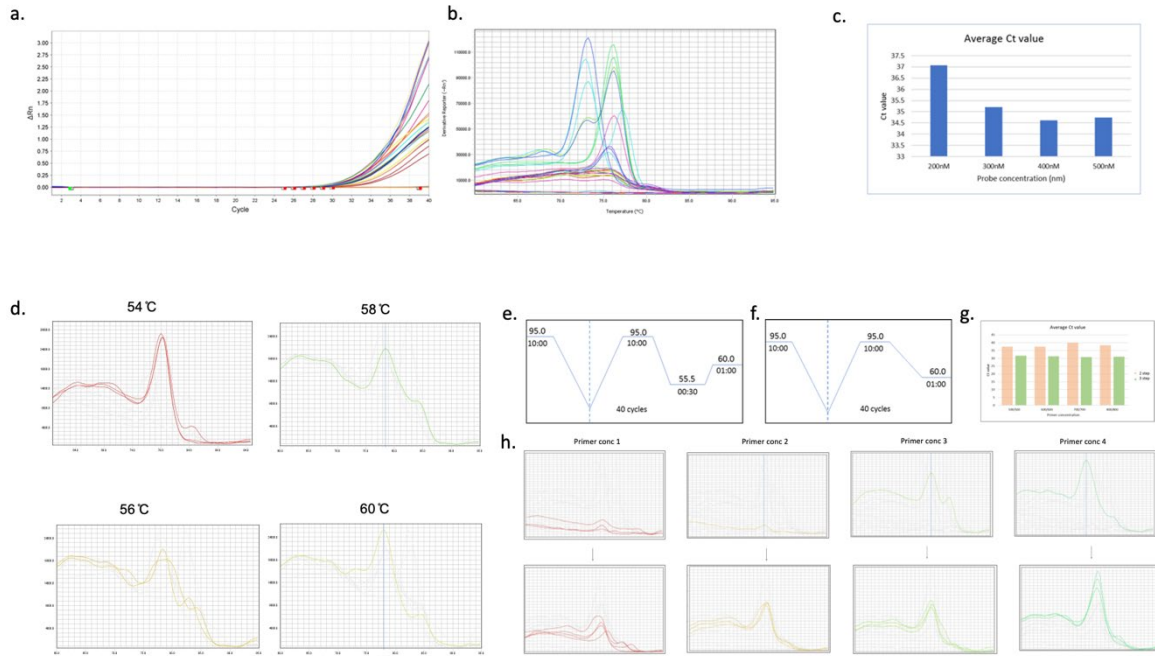

**Supplementary Figure 4: Summary of qPCR optimization measures.** Amplification plot (a) and melt curve plot (b) obtained by testing different concentrations of forward and reverse primers. Amplification plot demonstrating the Cycle threshold (Ct) values obtained at different probe concentrations (c). Annealing temperature gradient (54-60) $^{\circ}$ C assessment to determine the peak of target product and prevalence of non-specific products as shown on melt curve plots (d). Schematic depicting the three step (e) and two step (f) qPCR cycling conditions. Bar graph (g) demonstrating the lowering of Ct value at four different forward/reverse primer concentrations with the use of three step (green bar) vs two step (orange) cycling conditions. Melt curve plots (h) from two step (top panel) and three step (bottom panel) cycling conditions at four different primer concentrations comparing the maximum peak of the target product.



## Supplementary Figure 5

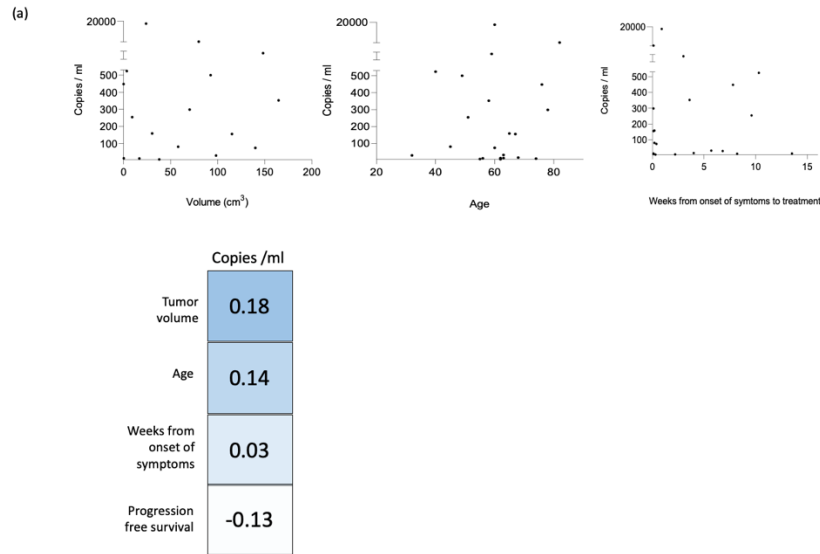

(b)

| Patient ID | T1  | T2  | Longitudinal sample |
|------------|-----|-----|---------------------|
| Wt2        | 0   | 0   | N/A                 |
| Wt5        | 0   | 0   | N/A                 |
| P20        | 5.2 | 3.1 | 8.6                 |
| Wt8        | 0   | 0   | N/A                 |
| P16        | 4.7 | 3.3 | 3.5                 |
| P10        | 6.9 | 4.2 | 9.1                 |
| Wt3        | 0   | 0   | N/A                 |

### Supplementary Figure 5: Reproducibility and intratumoral heterogeneity

(a) Linear regression (top) and correlation matrix (bottom) between copies/ml and clinical parameters. (b) Detection of EGFRvIII mutant levels in plasma derived EV RNA, in a group of EGFRvIII patients (P10, P16, P20) and controls (Wt3, Wt5, Wt8) at two different time points, T1 and T2. The copies of EGFRvIII are normalized to GAPDH run in the same well. Third column represents EGFRvIII copies (normalized to GAPDH) in longitudinal samples.



## Supplementary Table 3

### Cohort 2

| Study ID  | Ct rep 1   | Ct rep 2   | Avg_GAPDH   | Ct rep 1    | Ct rep 2    | Avg_EGFPwt  | Ct rep 1    | Ct rep 2    | Avg_EGFPwt  | Norm_GAPDH  | Norm_EGFPwt | Norm_EGFPwt |
|-----------|------------|------------|-------------|-------------|-------------|-------------|-------------|-------------|-------------|-------------|-------------|-------------|
| MGH-19012 | 18.3007984 | 18.2145844 | 18.25769138 | 25.4956028  | 25.08634567 | 25.29097748 | 28.7928333  | 28.8824825  | 28.8376079  | 0.80724301  | 24.48373318 | 28.03041649 |
| MGH-19006 | 18.2436118 | 17.7154045 | 17.97951126 | 22.6824047  | 22.69255638 | 22.68748093 | 35.62703    | 36.73383    | 36.19042946 | 0.529064178 | 22.15841675 | 35.65136528 |
| BC-17014  | 17.4554996 | 18.2439938 | 17.8497467  | 16.46021843 | 16.56148529 | 16.51085186 | 35.34437561 | 32.78369904 | 34.06433752 | 0.39929922  | 16.1155224  | 33.6647277  |
| MGH-18056 | 19.1898201 | 19.122864  | 19.1563421  | 18.9460113  | 19.0589161  | 19.0024637  | 21.43121719 | 21.73722504 | 21.59422112 | 1.705895017 | 17.29656868 | 19.8883261  |
| MGH-19108 | 18.0961285 | 18.2877941 | 18.19198129 | 16.6451599  | 16.93544579 | 16.78998089 | 30.032938   | 30.70248604 | 30.38771202 | 0.741514206 | 16.04846668 | 29.62619781 |
| MGH-21017 | 17.6818218 | 17.6644592 | 17.67314053 | 16.83738327 | 16.50945473 | 16.673419   | 30.3235281  | 27.02560425 | 28.67447853 | 0.228933443 | 16.45072556 | 28.45178509 |
| MGH-20035 | 18.2074375 | 17.3450603 | 17.78248983 | 20.22495842 | 19.74502563 | 19.98499203 | 23.72048    | 23.76638    | 23.74342918 | 0.325801849 | 19.65919018 | 23.41782273 |
| MGH-20084 | 18.5624428 | 17.7538863 | 18.15816402 | 24.99819183 | 25.07386589 | 25.03602886 | 34.96829987 | 35.30978775 | 35.13904381 | 0.707716942 | 24.32831192 | 34.3132887  |
| MGH-18134 | 18.2077579 | 18.4575672 | 18.33266258 | 19.78232384 | 20.00311279 | 19.89271832 | 31.90046883 | 29.71730042 | 30.80888462 | 0.8822155   | 19.0100282  | 29.92666912 |
| BC-17017  | 18.1289112 | 17.8028183 | 17.96486473 | 19.69542684 | 19.0052589  | 19.37797642 | 25.68888392 | 25.82143402 | 25.75520897 | 0.514417648 | 18.86355877 | 25.24079132 |
| MGH-18126 | 18.674136  | 19.7245007 | 18.29931831 | 22.41388647 | 21.30988884 | 21.86189385 | 24.10434151 | 23.56221771 | 23.83327961 | 0.848871231 | 21.0130242  | 22.98400838 |
| MGH-18087 | 18.128294  | 17.8565865 | 17.99246022 | 17.4209919  | 17.51852226 | 17.46975708 | 35.48660492 | 32.58485712 | 34.04078102 | 0.541993141 | 16.92776394 | 33.49878788 |
| MGH-20101 | 17.5928908 | 17.4765072 | 17.53454399 | 21.78619911 | 21.10041237 | 21.43330574 | 25.35233498 | 25.6563225  | 25.50898361 | 0.08409609  | 21.34920883 | 25.4248867  |
| MGH-20082 | 17.5004639 | 17.4350948 | 17.48777439 | 23.95437995 | 23.94470978 | 23.94909286 | 31.50045967 | 31.62404251 | 31.56225109 | 0.017327309 | 23.93176556 | 31.54492378 |
| MGH-19149 | 17.4770203 | 17.4238739 | 17.46044708 | 25.36227228 | 24.76921654 | 25.0657444  | 40          | 40          | 40          | 0           | 25.0657444  | 40          |
| BC-18032  | 17.5515838 | 17.6874275 | 17.61934566 | 22.28536415 | 22.23291588 | 22.25914001 | 22.32438278 | 22.00032616 | 22.16235447 | 0.16889562  | 22.09024143 | 21.99345589 |
| MGH-19093 | 17.8883724 | 18.3876057 | 18.13798904 | 30.82841    | 30.81092    | 30.818665   | 40          | 40          | 40          | 0.687541962 | 30.1123504  | 39.1245804  |
| MGH-19149 | 17.9953871 | 17.7803165 | 17.89034176 | 22.44480061 | 21.9545933  | 22.20151997 | 40          | 40          | 40          | 0.439894676 | 21.7612529  | 39.56010532 |
| BC-18037  | 18.0925293 | 17.6841471 | 17.8933382  | 21.95669365 | 22.41148758 | 22.18409081 | 27.92067528 | 27.77781868 | 27.84924688 | 0.442891121 | 21.74119949 | 27.40635086 |
| MGH-18081 | 17.743214  | 17.652309  | 17.64771652 | 16.42099119 | 16.64805603 | 16.53452396 | 31.90290642 | 33.7375412  | 32.82022381 | 0.19728944  | 16.33725452 | 32.62295437 |

### Cohort 3

| Patent ID | Ct rep 1     | Ct rep 2    | Avg_gapdh   | Ct rep 1    | Ct rep 2    | Avg_egt     | Ct rep 1    | Ct rep 2    | Avg_EGFPwt   | Norm_gapdh  | Norm_egt    | Norm_EGFPwt |
|-----------|--------------|-------------|-------------|-------------|-------------|-------------|-------------|-------------|--------------|-------------|-------------|-------------|
| MGH-20104 | 27.50389862  | 27.72080231 | 27.61235046 | 30.18013763 | 30.34205055 | 30.26109409 | 40          | 40          | 40           | 7.6563797   | 22.80471439 | 32.3436203  |
| MGH-20192 | 23.25525566  | 24.0925707  | 23.87391882 | 25.15888405 | 24.94959831 | 25.05424118 | 38.36100388 | 37.01246282 | 36.88673325  | 3.717946053 | 21.33629513 | 32.96878719 |
| MGH-20112 | 25.95660973  | 25.6935988  | 25.80798435 | 27.6222694  | 27.9166832  | 27.78446007 | 40          | 40          | 40           | 5.852013588 | 21.93244648 | 34.14786841 |
| MGH-21087 | 24.6199529   | 25.6025334  | 25.10974312 | 28.36639977 | 28.60464287 | 28.48552132 | 36.58282303 | 37.4393959  | 37.01610947  | 5.153772354 | 23.33174896 | 31.86233711 |
| MGH-20152 | 24.40704918  | 24.97627721 | 24.69266319 | 20.07348633 | 19.44069888 | 19.75704765 | 34.93694305 | 34.45499039 | 34.89596672  | 4.736692429 | 15.02035522 | 29.95927429 |
| MGH-21029 | 19.749860736 | 20.16213417 | 19.95597076 | 21.94208145 | 21.76098287 | 21.85148716 | 31.34784807 | 32.48620605 | 31.91707706  | 0           | 21.85148716 | 31.91707706 |
| MGH-21053 | 27.92509651  | 27.8609127  | 27.94300461 | 28.7177906  | 26.40461731 | 26.56120396 | 33.48728012 | 34.1177597  | 33.80751991  | 7.987033844 | 18.57417011 | 25.82048607 |
| MGH-21038 | 24.78341866  | 24.4810276  | 24.6322313  | 27.94438171 | 28.32129288 | 28.1328373  | 36.57641602 | 37.40880203 | 36.99209092  | 4.676252365 | 23.45658493 | 32.1635666  |
| MGH-21042 | 27.9183882   | 27.5788689  | 27.83486176 | 29.03850604 | 28.60367393 | 28.81790909 | 40          | 40          | 40           | 8.787890991 | 20.9382     | 32.1210961  |
| MGH-21017 | 20.97009277  | 20.61478135 | 20.78242706 | 18.9414463  | 19.12094116 | 19.03119373 | 32.08821432 | 32.68430328 | 32.3987588   | 0.836466299 | 18.19473743 | 27.83802223 |
| MGH-21046 | 22.45641899  | 22.2765873  | 22.36748986 | 28.46891504 | 28.19516845 | 28.33204269 | 34.95549390 | 34.93353653 | 34.94451523  | 2.411518097 | 25.9205246  | 32.53299713 |
| MGH-21056 | 23.96917152  | 24.82483292 | 24.39700222 | 24.67865143 | 24.5433445  | 24.58099796 | 34.8964022  | 33.88217377 | 34.38435099  | 4.441031458 | 20.11998651 | 29.92332554 |
| MGH-20086 | 24.62409621  | 24.44667825 | 24.53537273 | 22.82577705 | 22.75073242 | 22.82002081 | 33.97887421 | 33.98954201 | 33.98954201  | 4.57940197  | 18.17133045 | 29.41014004 |
| MGH-20084 | 25.42221069  | 25.41974258 | 25.42097664 | 28.03621483 | 28.40188026 | 28.21904755 | 37.81202698 | 37.87554932 | 37.84378815  | 5.465005875 | 22.75404167 | 32.37878227 |
| MGH-20100 | 28.87053871  | 25.7077198  | 25.78912926 | 27.37074471 | 27.69473839 | 27.5274155  | 34.58914902 | 34.27068903 | 34.41990852  | 5.833158493 | 21.69958305 | 28.58675003 |
| MGH-20112 | 29.91491699  | 29.56849615 | 29.74220697 | 31.8421463  | 32.36932755 | 32.15573692 | 40          | 40          | 40           | 9.786235809 | 22.36950111 | 30.21376419 |
| MGH-21058 | 24.41893196  | 24.28207207 | 24.30500201 | 23.77348954 | 24.12952814 | 23.95151234 | 31.32873836 | 31.91280746 | 31.619797291 | 4.38453125  | 19.55698109 | 27.22524166 |

## Supplementary Figure 6

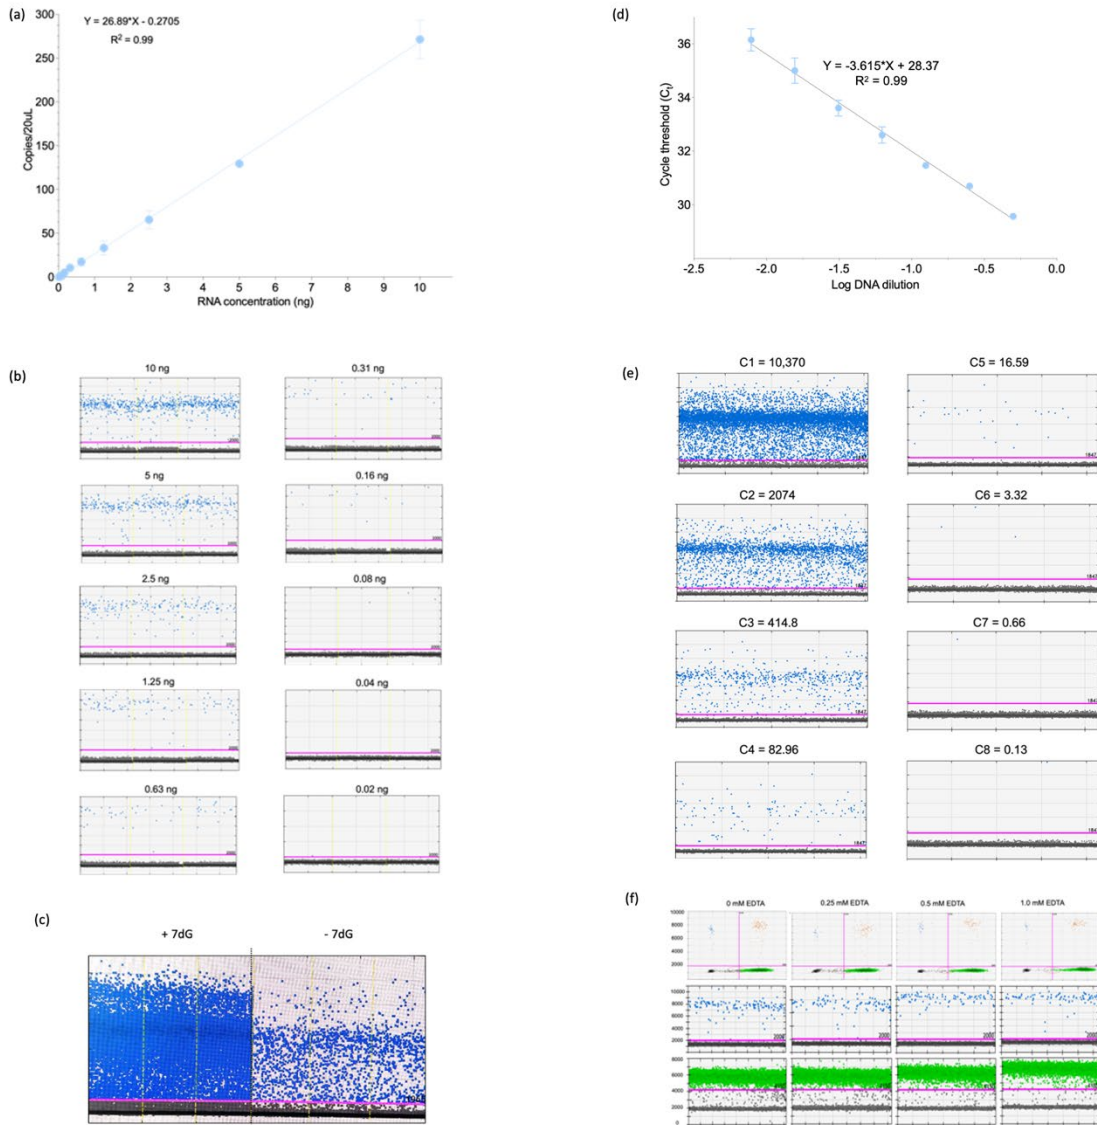

### Supplementary Figure 6: Assessment of assay efficiency and linearity

EGFRvIII cDNA reverse transcribed from serially diluted tumor tissue RNA was amplified using (a) ddPCR, and (d) qPCR. (a) Linear Regression graph depicting the EGFRvIII copies detected via ddPCR plotted against the RNA input. Regression analysis reported  $R^2 = 0.99$ . (b) ddPCR 1D plots demonstrating the mutant signal generated at each RNA concentration. (d) qPCR standard curve demonstrating Cycle threshold (C<sub>t</sub>) values plotted against the log RNA input. Linear regression analysis reported  $R^2 = 0.99$ . (c) ddPCR 1D plots depicting the mutant signal generated when EGFRvIII synthetic RNA is reverse transcribed into cDNA with (+) and without (-) 7dG followed by ddPCR amplification. (e) ddPCR 1D plots demonstrating the mutant signal generated when cDNA from serially diluted EGFRvIII synthetic RNA was amplified using ddPCR. C number corresponds to the data point and the EGFRvIII copy number input in each RT condition. (f) ddPCR 2D plots

(top row) and 1D plots depicting cluster density, tightness, and separation of mutant events (blue) and GAPDH events (green) at different concentrations of EDTA versus no EDTA addition to ddPCR.
